# Supplementary material for: Post-myocardial infarction heart failure dysregulates the bone vascular niche
Source: Nat Commun. 2021 Jun 25;12:3964. doi: 10.1038/s41467-021-24045-4 (PMC8233308; doi:10.1038/s41467-021-24045-4)
Supplement: Supplementary file 4 — Source Data [file 41467_2021_24045_MOESM4_ESM.xlsx]

## Sheet: Figure1
	Figure 1c							Figure 1d
	TypeH cells (%BM EC)							H type vessels length (mm)
	control	d1	d3	d7	d14	d28		control	d3	d14	d28
	31.33	29.41	18.87	27.4	14.29	18.64		142.043	88.5615	82.1114	69.6979
	25.74	35.29	22.64	31.25	10.42	13.48		88.7939	61.4888	66.4142	45.9155
	28.57	26.92	30.65	27.03	25	10.53		97.8391	73.224	44.6062	49.2899
	26.42	50	31.58	34.62	38	16.67				40.2238
	39.29		18.97	20.83	34	4.26
	52.94		22.86	23.53	17.02	13.21
	30.77		24.56	28.57	37.88	9
	40.54		21.88	31.58	19.23	5.56		Figure 1e
			17.86	8.16	21.74	20		#CD41 positive cells / DAPI area (normalized to control)
			36	26.19		6.52		control_d28	d28
			33.33	17.39				1.08089	1.2569
				7.46				0.951085	1.16418
								0.932271	1.42501
	LT-HSC (%LSK cells)							1.05305	1.03141
	control	d1	d3	d7	d14	d28		0.982703	1.26569
	5.93804	4.71204	5.41872	5.34045	6.31741	6.25376			1.02402
	6.47922	5.23732	5.58559	7.98969	7.89946	6.79923
	4.39122	5.6962	8.01131	7.43494	6.55738	8.32487
	6.13682	6.65054	6.86275	5.48571	7.14286	11.7241
	5.94744		6.60502	8.52601	6.05327	12.6897
	4.29185		6.61673	8.60927	9.31953	8.68794
	4.4686		6.70732	6.55376	6.25	7.46781
	5.65068		6.86406	6.45161	9.40711	7.36127
			7.90094	6.58737	11.8956	8.54922
			6.97941	7.48603		8.23045
			4.97186	7.46269
			4.45415	9.13978

## Sheet: Figure2
	Figure 2b
	CD31hiEMCNhi %BM EC			Total BM EC (%BM cells
	Healthy	HF		Healthy	HF
	12.06	3.37		0.23	0.29
	21.34	11.11		0.05	0.1
	10.98	2.26		0.09	0.47
	10.19	3.31		0.1	1.47
	9.55	1.84		0.45	0.59
	7.26	5.08		0.65	0.25
	6.1	4.94		1.68	0.14
	30.85	5.77		0.1	0.76
		5.1			0.09
		6.23			0.65
		1.38			0.34
		0.68			1.17
		4			0.35
		2.21			0.18
		10.49			0.06
		8.91			0.25
		2.18			0.26
		3.58

## Sheet: Figure3
	Figure 3b										Figure 3c
	%Emcn expressing cells					Emcn average expression					Il1b everage expression					Myc everage expression
	control	d7	d28			control	d7	d28			control	d7	d28			control	d7	d28
	100	111.293	36.891		average	0.013013	0.018402	0.00505561		average	1.62446	4.53366	2.6815		average	0.216884	0.360587	0.17088
					SE	0.00165999	0.00271227	0.00115958		SE	0.0885841	0.190257	0.130043		SE	0.011012	0.0193988	0.0111741
	Figure 3f
	MYC relative expression			MYC activation @450nm
	control	IL-1b		control	IL-1b
	1.17986	1.62643		1	1.27219
	0.947325	1.57929		1	1.34648
	0.922365	1.52368		1	1.27705
	0.950449	1.46697
	Figure 3g
	Double positive cells (%)
	control	IL-1b
	2.51	4.79
	3.49	4.25
	3.53	5.01
	3.39	4.49
	Figure 3h
	hMyc Ecs relative expression			H type vessels length (µm)
	control	MycEC-OE		control	MycEC-OE
	0.986592	1.22631		55.854	38.1052
	1.01341	1.26911		45.0317	37.7619
				45.3554	32.6558
				47.825	33.375
				48.5526	36.2675
				47.8333	36.5617

## Sheet: Figure4
	Figure 4b
	Type H EC (%BM EC)			Total BM Ecs (%BMC)			LT-HSC (%LSK cells)
	PBS	MCC950		PBS	MCC950		PBS	MCC950
	1.71957	1.42479		0.921808	2.01285		1.01864	0.842551
	1.12062	0.973012		0.716305	0.889807		1.27752	0.811748
	0.767199	1.93928		1.24516	0.562979		1.0551	0.913333
	1.308	1.48541		1.88796	0.782771		0.917072	0.524914
	1.12062	0.604452		0.789772	0.731239		0.731662	0.649424
	0.22927	2.07787		1.63627	3.46144			0.762291
	0.569904	1.7009		0.258167	0.456479
	0.643448	1.81336		1.21633	0.325769
	1.52137	1.39164		0.328228	0.201521
		2.26198			0.263527
	Figure 4c
	H type length
	PBS	MCC950
	0.955919	1.17023
	0.876078	1.73194
	0.947099	1.40579
	1.43644	0.991383
	1.0746	1.17461
	0.853503	1.36231
	0.856355
	Figure 4d
	#CD41 positive cels /DAPI area
	PBS	MCC950
	1.01864	0.842551
	1.27752	0.811748
	1.0551	0.913333
	0.917072	0.524914
	0.731662	0.649424
		0.762291

## Sheet: FigSup1
	SupFig1a
	EF (%)	Infarct size (%)
	38.834	80.3287
	39.302	27.7765
	36.944	70.0845
	25.965	32.8241
	22.878
	29.629
	39.803
	42.075
	34.713

## Sheet: FigSup3
	SupFig3a
	H type vessels lenth
	control d28	d28
	91.3629	69.6979
	94.5512	45.9155
	98.9112	49.2899

## Sheet: FigSup4
	FigSup4c
	CD41 positive cells (% HSC)				CD41 positive cell per femur+tibia				CD41 MFI
	control	d7	d28		control	d7	d28		control	d7	d28
	40.9091	45.9459	60.6061		1.24757	2.23814	3.44488		562	546	824
	41.0714	47.3684	58.8235		1.74281	1.32504	2.31465		522	619	700
	40	68.3333	53.3333		1.31109	1.68844	1.78537		524	748	682
		54.7619	68.2927			1.95089	3.51125			855	897
		65				2.4414				742

## Sheet: FigSup6
	FigSup6
	IL-1b intensity / DAPI control			MYC intensity / DAPI control
	Healthy control	HF		Healthy control	HF
	1.55008	1.88643		0.0488538	22.9371
	1.01872	1.29475		0.917305	43.0253
	0.431194	0.64195		2.03384	31.2181

## Sheet: FigSup7
	FigSup7d
	IL-1b area / DAPI area
	control	d1
	1.19273	2.49538
	1.08794	1.67404
	1.13976	2.40011
	0.579563	1.86497

## Sheet: FigSup8
	FigSup8b
	Type H EC (%BM EC)			Total BM Ecs (%BMC)
	PBS	ICI-118,551		PBS	ICI-118,551
	0.555452	0		1.29885	0.886223
	0.872854	1.30928		0.860861	1.74328
	0.678886	2.03666		1.12629	1.12851
	0.872854	0.678886		0.920368	1.12523
	1.74571	0.990807		1.0475	1.89514
	1.60789	1.14562		0.941583	0.838273
	1.1109	0.678886		1.09025	0.539529
	0.555452			0.714296
	FigSup8c
	LT-HSC (%LSK cells)
	PBS	ICI-118,551
	7.46004	6.34249
	7.41608	7.67754
	6.89061	6.86654
	7.93651	5.16039
	5.23996	7.04483
	7.04898	8.96432
	7.41971	6.12708
	6.04288
	FigSup8d
	H type vessels length (µm)
	PBS	ICI-118,551
	38.3746	28.0717
	22.2057	31.3795
	24.429	32.3367
	39.4959	31.1272
	33.0033	36.0281
	37.761	37.9396
	37.5902	36.2981
	33.8683
	FigSup8e
	CD41 positive cells / DAPI area (µm2)
	PBS	ICI-118,551
	4.14957e-05	2.7851e-05
	2.43545e-05	2.61723e-05
	2.13948e-05	1.95102e-05
	4.34667e-05	2.01079e-05
	4.4669e-05	2.79082e-05
	2.48788e-05	3.60348e-05
	3.00111e-05	3.4929e-05
	3.51591e-05
